# Supplementary material for: The effect of antiviral therapy on serum lipid profiles in chronic hepatitis C
Source: PubMed Central journal article supplement (PMC5940400; doi:10.18632/oncotarget.25092), 2018-04-20
Supplement: oncotarget-09-21313-s001.pdf [file oncotarget-09-21313-s001.pdf]

## The effect of antiviral therapy on serum lipid profiles in chronic hepatitis C

### SUPPLEMENTARY MATERIALS

**Supplementary Table 1: Increase of lipid levels after the treatment in SVR and Non SVR groups compared to baseline lipid levels and the differences**

| Characteristics          |                 | Baseline                | 6 months   | <i>P</i> value | Δ         | <i>P</i> value |
|--------------------------|-----------------|-------------------------|------------|----------------|-----------|----------------|
| <b>Triglycerides</b>     | n-863           | 91.1±34.9               | 101.4±55.1 | <b>0.0001</b>  |           | <b>0.012</b>   |
|                          | SVR(n-701)      | 90.5±34.3*              | 102.9±57.0 | <b>0.0001</b>  | 12.3±51.7 |                |
|                          | Non SVR (n-162) | 93.5±37.3*              | 94.5±45.6  | 0.690          | 1.3±43.2  |                |
| <b>Total cholesterol</b> | n-863           | 166.8±31.1              | 183.1±35.9 | <b>0.0001</b>  |           | <b>0.0001</b>  |
|                          | SVR(n-701)      | 166.0±30.3 <sup>#</sup> | 186.5±35.7 | <b>0.0001</b>  | 20.4±30.5 |                |
|                          | Non SVR (n-162) | 170.2±34.0 <sup>#</sup> | 168.1±32.5 | 0.352          | -2.0±28.0 |                |
| <b>HDLC</b>              | n-863           | 45.7±14.4               | 49.1±14.9  | <b>0.0001</b>  |           | <b>0.021</b>   |
|                          | SVR(n-701)      | 45.4±14.2 <sup>s</sup>  | 49.3±15.0  | <b>0.0001</b>  | 3.8±11.5  |                |
|                          | Non SVR (n-162) | 46.7±15.1 <sup>s</sup>  | 48.3±14.7  | 0.066          | 1.5±10.6  |                |
| <b>LDLC</b>              | n-863           | 97.9±27.9               | 111.1±31.3 | <b>0.0001</b>  |           | <b>0.0001</b>  |
|                          | SVR(n-701)      | 97.7±27.4 <sup>^</sup>  | 114.2±31.3 | <b>0.0001</b>  | 16.4±27.9 |                |
|                          | Non SVR (n-162) | 98.6±29.6 <sup>^</sup>  | 97.5±27.5  | 0.596          | -1.0±24.5 |                |

HDLC – High density lipoprotein cholesterol, LDLC – low density lipoprotein cholesterol, Δ - the difference of lipid levels (shown the mean and SD), \* - not significant, <sup>#</sup> - not significant, <sup>s</sup> - not significant, <sup>^</sup> - not significant.

**Supplementary Table 2: Increase of lipid levels after the treatment in low and high FIB4 groups compared to baseline lipid levels and the differences**

| Characteristics          |                    | Baseline                | 6 months   | <i>P</i> value | $\Delta$  | <i>P</i> value |
|--------------------------|--------------------|-------------------------|------------|----------------|-----------|----------------|
| <b>Triglycerides</b>     | n-863              | 91.1±34.9               | 101.4±55.1 | <b>0.0001</b>  |           |                |
|                          | FIB4 <3.25 (n-553) | 89.7±35.4*              | 103.2±57.9 | <b>0.0001</b>  | 13.5±51.9 | <b>0.011</b>   |
|                          | FIB4 ≥3.25 (n-310) | 93.6±33.9*              | 98.1±49.6  | 0.095          | 4.4±47.1  |                |
| <b>Total cholesterol</b> | n-863              | 166.8±31.1              | 183.1±35.9 | <b>0.0001</b>  |           |                |
|                          | FIB4 <3.25 (n-553) | 167.9±32.1 <sup>#</sup> | 184.4±36.3 | <b>0.0001</b>  | 16.5±30.9 | 0.722          |
|                          | FIB4 ≥3.25 (n-310) | 164.9±29.0 <sup>#</sup> | 180.6±34.9 | <b>0.0001</b>  | 15.7±32.0 |                |
| <b>HDLC</b>              | n-863              | 45.7±14.4               | 49.1±14.9  | <b>0.0001</b>  |           |                |
|                          | FIB4 <3.25 (n-553) | 45.9±15.1 <sup>s</sup>  | 49.0±15.5  | <b>0.0001</b>  | 3.0±11.7  | 0.211          |
|                          | FIB4 ≥3.25 (n-310) | 45.3±12.9 <sup>s</sup>  | 49.3±13.9  | <b>0.0001</b>  | 4.0±10.7  |                |
| <b>LDLC</b>              | n-863              | 97.9±27.9               | 111.1±31.3 | <b>0.0001</b>  |           |                |
|                          | FIB4 <3.25 (n-553) | 99.3±28.4 <sup>^</sup>  | 112.6±31.6 | <b>0.0001</b>  | 13.2±28.6 | 0.913          |
|                          | FIB4 ≥3.25 (n-310) | 95.4±26.6 <sup>^</sup>  | 108.4±30.7 | <b>0.0001</b>  | 13.0±27.3 |                |

HDLC – High density lipoprotein cholesterol, LDLC – low density lipoprotein cholesterol,  $\Delta$  - the difference of lipid levels (shown the mean and SD), \* - not significant, # - not significant, <sup>s</sup> - not significant, <sup>^</sup> -  $p=0.047$ .

**Supplementary Table 3: Mean of baseline and 6 months after treatment lipid levels in advanced and mild fibrosis for SVR and Non SVR patients**

| Characteristics          | Treatment response and FIB4 | Baseline   | 6 months   | <i>P</i> value | $\Delta$ SVR | <i>P</i> value | $\Delta$ non SVR | <i>P</i> value |
|--------------------------|-----------------------------|------------|------------|----------------|--------------|----------------|------------------|----------------|
| <b>Triglycerides</b>     | SVR/FIB4 <3.25 (n-466)      | 89.1±34.8  | 104.3±59.3 | <b>0.0001</b>  | 15.1±53.3    | <b>0.041</b>   |                  |                |
|                          | SVR/FIB4 ≥3.25 (n-235)      | 93.3±33.1  | 100.7±52.1 | <b>0.033</b>   | 6.7±47.9     |                |                  |                |
|                          | Non SVR/FIB4 <3.25 (n-87)   | 92.5±38.1  | 97.2±49.8  | 0.304          |              |                | 4.6±42.3         | 0.292          |
|                          | Non SVR/FIB4 ≥3.25 (n-75)   | 94.6±36.6  | 92.0±40.2  | 0.624          |              |                | -2.5±44.1        |                |
| <b>Total cholesterol</b> | SVR/FIB4 <3.25 (n-466)      | 166.7±30.9 | 186.7±36.3 | <b>0.0001</b>  | 19.9±30.4    | 0.533          |                  |                |
|                          | SVR/FIB4 ≥3.25 (n-235)      | 164.6±29.3 | 186.1±34.6 | <b>0.0001</b>  | 21.5±30.7    |                |                  |                |
|                          | Non SVR/FIB4 <3.25 (n-87)   | 174.0±37.8 | 172.1±34.2 | 0.524          |              |                | -1.8±27.2        | 0.927          |
|                          | Non SVR/FIB4 ≥3.25 (n-75)   | 165.7±28.4 | 163.4±30.0 | 0.501          |              |                | -2.2±29.1        |                |
| <b>HDLC</b>              | SVR/FIB4 <3.25 (n-466)      | 45.9±15.0  | 49.3±15.6  | <b>0.0001</b>  | 3.4±11.9     | 0.167          |                  |                |
|                          | SVR/FIB4 ≥3.25 (n-235)      | 44.5±12.2  | 49.2±13.8  | <b>0.0001</b>  | 4.6±10.5     |                |                  |                |
|                          | Non SVR/FIB4 <3.25 (n-87)   | 46.0±15.6  | 47.1±15.1  | 0.329          |              |                | 1.0±10.2         | 0.549          |
|                          | Non SVR/FIB4 ≥3.25 (n-75)   | 47.6±14.7  | 49.7±14.3  | 0.108          |              |                | 2.0±11.1         |                |
| <b>LDLC</b>              | SVR/FIB4 <3.25 (n-466)      | 98.3±27.5  | 114.5±31.7 | <b>0.0001</b>  | 16.1±28.7    | 0.674          |                  |                |
|                          | SVR/FIB4 ≥3.25 (n-235)      | 96.5±27.3  | 113.6±30.5 | <b>0.0001</b>  | 17.1±26.4    |                |                  |                |
|                          | Non SVR/FIB4 <3.25 (n-87)   | 104.4±32.5 | 102.2±28.9 | 0.366          |              |                | -2.2±22.7        | 0.508          |
|                          | Non SVR/FIB4 ≥3.25 (n-75)   | 91.8±24.4  | 92.1±25.7  | 0.908          |              |                | 0.3±26.6         |                |

HDLC – High density lipoprotein cholesterol, LDLC – low density lipoprotein cholesterol,  $\Delta$  - the difference of lipid levels (shown the mean and SD).

**Supplementary Table 4: Increase of lipid levels after the treatment in high and normal blood pressure groups compared to baseline lipid levels and the differences**

| Characteristics          |                      | Baseline                | 6 months   | P value       | Δ         | P value      |
|--------------------------|----------------------|-------------------------|------------|---------------|-----------|--------------|
| <b>Triglycerides</b>     | n-816                | 91.3±34.8               | 101.5±55.4 | <b>0.0001</b> |           | 0.353        |
|                          | Hypertension (n-194) | 97.6±36.0*              | 110.7±55.2 | <b>0.0001</b> | 13.0±49.8 |              |
|                          | Normal (n-622)       | 89.4±34.2*              | 98.7±55.1  | <b>0.0001</b> | 9.2±50.0  |              |
| <b>Total cholesterol</b> | n-816                | 166.7±31.2              | 183.0±36.1 | <b>0.0001</b> |           | <b>0.031</b> |
|                          | Hypertension (n-194) | 169.4±30.8 <sup>#</sup> | 181.4±35.5 | <b>0.0001</b> | 12.0±33.5 |              |
|                          | Normal (n-622)       | 165.8±31.3 <sup>#</sup> | 183.4±36.3 | <b>0.0001</b> | 17.6±30.7 |              |
| <b>HDLC</b>              | n-816                | 45.5±14.4               | 49.2±15.1  | <b>0.0001</b> |           | <b>0.040</b> |
|                          | Hypertension (n-194) | 45.4±14.4 <sup>§</sup>  | 47.5±13.8  | <b>0.007</b>  | 2.1±11.2  |              |
|                          | Normal (n-622)       | 45.5±14.4 <sup>§</sup>  | 49.7±15.5  | <b>0.0001</b> | 4.1±11.5  |              |
| <b>LDLC</b>              | n-816                | 97.7±28.0               | 110.9±31.4 | <b>0.0001</b> |           | 0.195        |
|                          | Hypertension (n-194) | 99.2±29.2 <sup>^</sup>  | 110.0±31.5 | <b>0.0001</b> | 10.8±28.8 |              |
|                          | Normal (n-622)       | 97.3±27.6 <sup>^</sup>  | 111.1±31.4 | <b>0.0001</b> | 13.8±28.1 |              |

HDLC – High density lipoprotein cholesterol, LDLC – low density lipoprotein cholesterol, Δ - the difference of lipid levels (shown the mean and SD), \* -  $p=0.004$ , # - not significant, § - not significant, ^ - not significant.

**Supplementary Table 5: Mean of baseline and 6 months after treatment lipid levels in high and normal blood pressure for SVR and Non SVR patients**

| Characteristics          | Treatment response and blood pressure | Baseline   | 6 months   | P value       | Δ SVR     | P value | Δ non SVR | P value |
|--------------------------|---------------------------------------|------------|------------|---------------|-----------|---------|-----------|---------|
| <b>Triglycerides</b>     | SVR/Normal (n-515)                    | 89.2±34.0  | 100.4±57.8 | <b>0.0001</b> | 11.1±51.4 | 0.255   |           |         |
|                          | SVR/Hypertension (n-145)              | 95.8±34.1  | 112.5±56.0 | <b>0.0001</b> | 16.7±51.8 |         |           |         |
|                          | Non SVR/ Normal (n-107)               | 90.2±35.1  | 90.3±39.1  | 0.985         |           |         | 0.1±41.5  | 0.749   |
|                          | Non SVR/ Hypertension (n-49)          | 103.0±40.8 | 105.4±53.2 | 0.693         |           |         | 2.3±42.0  |         |
| <b>Total cholesterol</b> | SVR/Normal (n-515)                    | 165.9±31.2 | 187.3±35.8 | <b>0.0001</b> | 21.3±29.8 | 0.260   |           |         |
|                          | SVR/Hypertension (n-145)              | 165.5±27.7 | 183.7±36.6 | <b>0.0001</b> | 18.1±33.5 |         |           |         |
|                          | Non SVR/ Normal (n-107)               | 165.5±32.3 | 165.1±33.0 | 0.893         |           |         | -0.3±28.6 | 0.251   |
|                          | Non SVR/ Hypertension (n-49)          | 180.7±36.5 | 174.7±31.2 | 0.125         |           |         | -5.9±26.6 |         |
| <b>HDLC</b>              | SVR/Normal (n-515)                    | 45.5±14.4  | 50.1±15.5  | <b>0.0001</b> | 4.5±11.5  | 0.093   |           |         |
|                          | SVR/Hypertension (n-145)              | 44.3±13.5  | 47.0±13.6  | <b>0.006</b>  | 2.6±11.6  |         |           |         |
|                          | Non SVR/ Normal (n-107)               | 45.6±14.6  | 47.7±15.3  | <b>0.042</b>  |           |         | 2.1±11.0  | 0.415   |
|                          | Non SVR/ Hypertension (n-49)          | 48.6±16.4  | 49.3±14.3  | 0.618         |           |         | 0.6±9.6   |         |
| <b>LDLC</b>              | SVR/Normal (n-515)                    | 97.4±27.2  | 114.1±31.4 | <b>0.0001</b> | 16.7±27.7 | 0.593   |           |         |
|                          | SVR/Hypertension (n-145)              | 98.2±28.6  | 113.5±31.8 | <b>0.0001</b> | 15.3±29.3 |         |           |         |
|                          | Non SVR/ Normal (n-107)               | 96.8±29.2  | 96.6±27.6  | 0.922         |           |         | -0.2±25.6 | 0.583   |
|                          | Non SVR/ Hypertension (n-49)          | 102.3±31.1 | 99.7±28.6  | 0.433         |           |         | -2.6±23.0 |         |

HDLC – High density lipoprotein cholesterol, LDLC – low density lipoprotein cholesterol, BMI – body mass index, SVR – sustained virological response.

**Supplementary Table 6: Increase of lipid levels after the treatment in high and normal BMI groups compared to baseline lipid levels and the differences**

| Characteristics          |                    | Baseline                | 6 months   | <i>P</i> value | Δ         | <i>P</i> value |
|--------------------------|--------------------|-------------------------|------------|----------------|-----------|----------------|
| <b>Triglycerides</b>     | n-863              | 91.1±34.9               | 101.4±55.1 | <b>0.0001</b>  |           | 0.843          |
|                          | High BMI (n-391)   | 99.0±35.5*              | 109.7±53.6 | <b>0.0001</b>  | 10.6±51.6 |                |
|                          | Normal BMI (n-472) | 84.5±33.0*              | 94.5±55.4  | <b>0.0001</b>  | 9.9±49.4  |                |
| <b>Total cholesterol</b> | n-863              | 166.8±31.1              | 183.1±35.9 | <b>0.0001</b>  |           | <b>0.003</b>   |
|                          | High BMI (n-391)   | 169.0±29.5 <sup>#</sup> | 181.8±35.8 | <b>0.0001</b>  | 12.7±30.2 |                |
|                          | Normal BMI (n-472) | 165.0±32.2 <sup>#</sup> | 184.1±35.9 | <b>0.0001</b>  | 19.1±31.9 |                |
| <b>HDLC</b>              | n-863              | 45.7±14.4               | 49.1±14.9  | <b>0.0001</b>  |           | 0.873          |
|                          | High BMI (n-391)   | 43.4±13.4 <sup>s</sup>  | 46.7±14.6  | <b>0.0001</b>  | 3.3±11.0  |                |
|                          | Normal BMI (n-472) | 47.6±14.9 <sup>s</sup>  | 51.1±14.9  | <b>0.0001</b>  | 3.4±11.7  |                |
| <b>LDLC</b>              | n-863              | 97.9±27.9               | 111.1±31.3 | <b>0.0001</b>  |           | <b>0.042</b>   |
|                          | High BMI (n-391)   | 100.9±27.6 <sup>^</sup> | 111.9±31.8 | <b>0.0001</b>  | 11.0±28.9 |                |
|                          | Normal BMI (n-472) | 95.4±27.8 <sup>^</sup>  | 110.4±30.9 | <b>0.0001</b>  | 14.9±27.4 |                |

HDLC – High density lipoprotein cholesterol, LDLC – low density lipoprotein cholesterol, BMI – body mass index, Δ - the difference of lipid levels (shown the mean and SD), \* -  $p < 0.0001$ , <sup>#</sup> - not significant, <sup>s</sup> -  $p < 0.0001$ , <sup>^</sup> -  $p = 0.004$ .

**Supplementary Table 7: Mean of baseline and 6 months after treatment lipid levels in high and normal BMI for SVR and Non SVR patients**

| Characteristics          | Treatment response and blood pressure | Baseline   | 6 months   | P value       | Δ SVR     | P value      | Δ non SVR | P value      |
|--------------------------|---------------------------------------|------------|------------|---------------|-----------|--------------|-----------|--------------|
| <b>Triglycerides</b>     | SVR/Normal BMI (n-403)                | 83.9±32.0  | 97.0±58.5  | <b>0.0001</b> | 13.0±51.2 | 0.673        |           |              |
|                          | SVR/High BMI (n-298)                  | 99.4±35.3  | 110.8±53.9 | <b>0.0001</b> | 11.3±52.5 |              |           |              |
|                          | Non SVR/Normal BMI (n-69)             | 87.7±38.3  | 79.7±26.9  | <b>0.044</b>  |           |              | -8.0±32.4 | <b>0.011</b> |
|                          | Non SVR/High BMI (n-93)               | 97.7±36.1  | 106.0±52.9 | 0.103         |           |              | 8.3±48.7  |              |
| <b>Total cholesterol</b> | SVR/Normal BMI (n-403)                | 164.2±31.0 | 186.9±35.9 | <b>0.0001</b> | 22.7±30.6 | <b>0.020</b> |           |              |
|                          | SVR/High BMI (n-298)                  | 168.5±29.3 | 185.9±35.6 | <b>0.0001</b> | 17.3±30.1 |              |           |              |
|                          | Non SVR/Normal BMI (n-69)             | 169.6±38.3 | 167.4±31.3 | 0.556         |           |              | -2.2±31.4 | 0.942        |
|                          | Non SVR/High BMI (n-93)               | 170.5±30.6 | 168.6±33.6 | 0.468         |           |              | -1.9±25.3 |              |
| <b>HDLC</b>              | SVR/Normal BMI (n-403)                | 47.3±14.7  | 51.4±15.1  | <b>0.0001</b> | 4.0±11.7  | 0.590        |           |              |
|                          | SVR/High BMI (n-298)                  | 42.8±12.9  | 46.4±14.4  | <b>0.0001</b> | 3.5±11.3  |              |           |              |
|                          | Non SVR/Normal BMI (n-69)             | 49.0±15.6  | 49.1±13.9  | 0.940         |           |              | 0.1±11.1  | 0.137        |
|                          | Non SVR/High BMI (n-93)               | 45.0±14.6  | 47.6±15.4  | <b>0.015</b>  |           |              | 2.6±10.1  |              |
| <b>LDLC</b>              | SVR/Normal BMI (n-403)                | 94.9±27.2  | 112.5±31.2 | <b>0.0001</b> | 17.6±26.8 | 0.213        |           |              |
|                          | SVR/High BMI (n-298)                  | 101.5±27.4 | 116.5±31.4 | <b>0.0001</b> | 14.9±29.3 |              |           |              |
|                          | Non SVR/Normal BMI (n-69)             | 98.2±31.5  | 97.7±25.9  | 0.881         |           |              | -0.4±25.7 | 0.804        |
|                          | Non SVR/High BMI (n-93)               | 98.8±28.3  | 97.4±28.8  | 0.560         |           |              | -1.4±23.8 |              |

HDLC – High density lipoprotein cholesterol, LDLC – low density lipoprotein cholesterol, BMI – body mass index, SVR – sustained virological response.
